# Supplementary material
Source: Elsevier journal article supplement (https://www.sciencedirect.com/science/article/pii/S0325754119300483)
Supplement: mmc1 [file S0325754119300483:mmc1.docx]

Table S1: Phenotypic identification of *Achromobacter* isolates

|  |  |  | | | | | | **API 20 NE** | **MALDI-TOF MS** | |
| --- | --- | --- | --- | --- | --- | --- | --- | --- | --- | --- |
| **Isolate** | **Clinical specimen** | **Acetamide** | **NO2** | **Glucose** | **Xilose** | **Galactose** | **ID** | **ID** | **Score** | **ID** |
| **A39** | sputum | - | + | + | + | + | *A. xylosoxidans* | *A. xylosoxidans* | 2.032 | *A. xylosoxidans* |
| **A43** | sputum | + | - | - | + | + | *Achromobacter* spp*.* | *A. xylosoxidans* | 2.032 | *A. xylosoxidans* |
| **A45** | sputum | + | - | + | + | + | *Achromobacter* spp*.* | *Achromobacter* spp*.* | 2.032 | *A. xylosoxidans* |
| **A46** | sputum | + | - | + | + | + | *Achromobacter* spp*.* | *A. xylosoxidans* | 2.032 | *A. xylosoxidans* |
| **A49** | sputum | + | + | + | + | + | *A. xylosoxidans* | *A. xylosoxidans* | 2.032 | *A. xylosoxidans* |
| **A50** | sputum | + | + | + | + | + | *A. xylosoxidans* | *A. xylosoxidans* | 2.032 | *A. xylosoxidans* |
| **A51** | sputum | + | + | + | + | + | *A. xylosoxidans* | *A. xylosoxidans* | 2.032 | *A. xylosoxidans* |
| **A52** | sputum | + | + | + | + | + | *Achromobacter* spp*.* | *A. xylosoxidans* | 2.032 | *A. xylosoxidans* |
| **A53** | sputum | + | + | + | + | + | *Achromobacter* spp*.* | *A. xylosoxidans* | 2.032 | *A. ruhlandii* |
| **A79** | sputum | + | + | + | + | + | *Achromobacter* spp*.* | *A. xylosoxidans* | 2.032 | *A. xylosoxidans* |
| **A134** | sputum | + | - | + | + | - | *Achromobacter* spp*.* | *A. xylosoxidans* | 2.287 | *A. xylosoxidans* |
| **A131** | sputum | + | - | + | + | - | *Achromobacter* spp*.* | *A. xylosoxidans* | 2.015 | *A. xylosoxidans* |
| **A113** | sputum | + | + | + | + | + | *A. xylosoxidans* | *A. xylosoxidans* | 1.789 | *A. xylosoxidans* |
| **38** | sputum | + | - | + | + | - | *Achromobacter* spp*.* | *A. xylosoxidans* | 2.264 | *A. xylosoxidans* |
| **39** | sputum | + | - | + | + | - | *Achromobacter* spp*.* | *A. xylosoxidans* | 2.264 | *A. xylosoxidans* |
| **67** | sputum | + | - | + | + | - | *Achromobacter* spp*.* | *A. xylosoxidans* | 2.285 | *A. xylosoxidans* |
| **79** | sputum | + | + | + | + | + | *A. xylosoxidans* | *A. xylosoxidans* | 2.048 | *A. xylosoxidans* |
| **80** | sputum | - | - | + | + | - | *Achromobacter* spp*.* | *A. denitrificans* | 2.224 | *A. xylosoxidans* |
| **114** | sputum | + | + | + | + | + | *A. xylosoxidans* | *A. xylosoxidans* | 2.048 | *A. xylosoxidans* |
| **319** | blood | + | - | + | + | - | *Achromobacter* spp*.* | *A. xylosoxidans* | 1.996 | *A. xylosoxidans* |
| **336** | blood | + | - | - | - | - | *Achromobacter* spp*.* | *A. xylosoxidans* | 2.01 | *A. xylosoxidans* |
| **A1** | blood | + | + | + | + | + | *A. xylosoxidans* | *A. xylosoxidans* | 1.765 | *A. xylosoxidans* |
| **A2** | urine | + | + | + | + | + | *A. xylosoxidans* | *A. xylosoxidans* | 1.965 | *A. xylosoxidans* |
| **A3** | blood | + | + | + | + | + | *A. xylosoxidans* | *A. xylosoxidans* | 2.148 | *A. xylosoxidans* |
| **A4** | - | + | + | + | + | + | *A. xylosoxidans* | *A. xylosoxidans* | 1.967 | *A. xylosoxidans* |
| **A5** | sputum | + | + | + | + | + | *A. xylosoxidans* | *A. xylosoxidans* | 2.071 | *A. xylosoxidans* |
| **A6** | sputum | + | + | + | + | + | *A. xylosoxidans* | *A. xylosoxidans* | 1.899 | *A. xylosoxidans* |
| **A7** | sputum | + | + | + | + | + | *A. xylosoxidans* | *A. xylosoxidans* | 1.874 | *A. xylosoxidans* |
| **A8** | sputum | + | + | + | + | + | *A. xylosoxidans* | *A. xylosoxidans* | 1.952 | *A. xylosoxidans* |
| **A9** | sputum | + | + | + | + | + | *A. xylosoxidans* | *A. xylosoxidans* | 2.126 | *A. xylosoxidans* |
| **A10** | sputum | + | + | + | + | + | *A. xylosoxidans* | *A. xylosoxidans* | 1.975 | *A. xylosoxidans* |
| **A11** | sputum | + | + | + | + | + | *A. xylosoxidans* | *A. xylosoxidans* | 1.701 | *A. xylosoxidans* |
| **A12** | sputum | + | + | + | + | + | *A. xylosoxidans* | *A. xylosoxidans* | 1.900 | *A. xylosoxidans* |
| **A13** | sputum | + | + | + | + | + | *A. xylosoxidans* | *A. xylosoxidans* | 1.994 | *A. xylosoxidans* |
| **A14** | urine | + | + | + | + | + | *A. xylosoxidans* | *A. xylosoxidans* | 2.132 | *A. xylosoxidans* |
| **A15** | bone tissue | + | + | + | + | + | *A. xylosoxidans* | *A. xylosoxidans* | 2.020 | *A. xylosoxidans* |
| **A16** | sputum | + | + | + | + | + | *A. xylosoxidans* | *A. xylosoxidans* | 1.798 | *A. xylosoxidans* |
| **A17** | sputum | + | + | + | + | + | *A. xylosoxidans* | *A. xylosoxidans* | 2.016 | *A. xylosoxidans* |
| **A18** | soft tissues | + | + | + | + | + | *A. xylosoxidans* | *A. xylosoxidans* | 1.998 | *A. xylosoxidans* |
| **A19** | sputum | + | + | + | + | + | *A. xylosoxidans* | *A. xylosoxidans* | 2.020 | *A. xylosoxidans* |
| **A20** | blood | + | + | + | + | + | *A. xylosoxidans* | *A. xylosoxidans* | 1.980 | *A. xylosoxidans* |

*All isolates were motile and reduced nitrates

Table S2: Minimal Inhibitory Concentration (μg/ml) of *Achromobacter* spp. clinical isolates used in the present study.

|  | ID | AMP | PIP | FOX | CAZ | FEP | PTZ | IPM | MEM | CIP | LEV | KAN | GEN | TMS | TET | COL |
| --- | --- | --- | --- | --- | --- | --- | --- | --- | --- | --- | --- | --- | --- | --- | --- | --- |
| A39 | *A. xylosoxidans* | 16 | 2 | >256 | 4 | 32 | 1 | 2 | 0.125 | 4 | 16 | 128 | 32 | 2 | 64 | 16 |
| A43 | *A. dolens* | 32 | 2 | >256 | 4 | 16 | 1 | 1 | 0.125 | ≤ 0.5 | 2 | 32 | 16 | 2 | 64 | 16 |
| A45 | *A. pulmonis* | 32 | ≤ 0.5 | 1 | ≤ 0.25 | ≤ 1 | ≤ 0.06 | ≤ 0.03 | 0.125 | ≤ 0.5 | 4 | ≤ 64 | 32 | ≤ 0.03 | 64 | ≤ 0.125 |
| A46 | *A. spiritinus* | 32 | ≤ 0.5 | 32 | 1 | 4 | ≤ 0.06 | 0.25 | 0.25 | 1 | 4 | >1024 | >1024 | 1 | 16 | 4 |
| A49 | *A. xylosoxidans* | 8 | 1 | 256 | 4 | 16 | 0.5 | 2 | 0.25 | 1 | 4 | >1024 | >1024 | 1 | 256 | 32 |
| A50 | *A. dolens* | 16 | 2 | >256 | 4 | 8 | 1 | 1 | 0.125 | ≤ 0.5 | 4 | 16 | 8 | 8 | 256 | 32 |
| A51 | *A. xylosoxidans* | 32 | 2 | >256 | 4 | 16 | 1 | 2 | 0.25 | 8 | 4 | 64 | 16 | 32 | 64 | 32 |
| A52 | *A. xylosoxidans* | 16 | 1 | 64 | 1 | 8 | 0.25 | 1 | 0.25 | 2 | 2 | 64 | 64 | 2 | 64 | 32 |
| A53 | *A. dolens* | 16 | 1 | 256 | 4 | 64 | 1 | 1 | 0.125 | 4 | 2 | 256 | 64 | 2 | 64 | 64 |
| A79 | *A. xylosoxidans* | 16 | 2 | 256 | 16 | 128 | 0.5 | 2 | 0.125 | 64 | 2 | >1024 | >1024 | 1 | 16 | 32 |
| A113 | *A. xylosoxidans* | 32 | ≤0.5 | >256 | 1 | 128 | 2 | 1 | 1 | 8 | 8 | 512 | 128 | 1 | 64 | 256 |
| A131 | *A. ruhlandii* | 256 | 2 | >256 | 8 | 32 | 1 | 4 | 32 | 16 | 16 | >1024 | >1024 | 1 | 16 | 128 |
| A134 | *A. ruhlandii* | 32 | ≤0.5 | >256 | 16 | 128 | 0.5 | 4 | 32 | 4 | 4 | >1024 | >1024 | 2 | 16 | 64 |
| 38 | *A. ruhlandii* | >256 | 32 | >256 | 8 | 64 | 16 | 128 | 8 | 1 | 2 | 256 | 256 | 8 | 64 | 64 |
| 39 | *A. ruhlandii* | 256 | 32 | 256 | 8 | 128 | 32 | 32 | 64 | 2 | 4 | 256 | 256 | 8 | 64 | 64 |
| 67 | *A. ruhlandii* | 16 | 0.25 | 128 | 64 | 64 | 1 | 1 | 1 | 2 | 2 | 32 | 32 | 32 | 64 | 16 |
| 79 | *A. insuavis* | 16 | 0.25 | 32 | 8 | 32 | 0.5 | 1 | 0.125 | 8 | 8 | 128 | 128 | 0.25 | 64 | 4 |
| 80 | *A. ruhlandii* | 128 | 256 | 256 | 4 | 64 | 32 | 64 | 64 | 1 | 4 | 32 | 256 | 16 | 32 | 4 |
| 114 | *A. insuavis* | 32 | 0.125 | 32 | 64 | 64 | 1 | 1 | 0.125 | 16 | 4 | 64 | 128 | 8 | 32 | 0.5 |
| 319 | *A. ruhlandii* | 16 | 0.5 | 32 | 8 | 32 | 0.5 | 2 | 0.5 | 4 | 1 | 32 | 128 | 2 | 64 | 16 |
| 336 | *A. dolens* | 32 | 1 | 128 | 8 | 64 | 2 | 1 | 0.25 | 4 | 8 | 32 | 128 | 1 | 16 | 0.5 |
| A1 | *A. xylosoxidans* | 8 | 8 | 32 | 32 | 128 | 4 | 4 | 0.25 | 64 | 64 | 128 | 128 | 64 | 64 | 0.25 |
| A2 | *A. xylosoxidans* | 16 | 0.25 | 256 | 8 | 64 | 0.25 | 2 | 1 | 64 | 128 | 64 | 64 | 128 | 64 | 4 |
| A3 | *A. xylosoxidans* | 32 | 0.5 | >256 | 16 | 32 | 0.5 | 1 | 0.5 | 4 | 2 | 128 | 128 | 256 | 32 | 4 |
| A4 | *A. xylosoxidans* | 32 | 0.5 | >256 | 8 | 32 | 0.5 | 2 | 0.06 | 2 | 2 | 64 | 32 | 0.125 | 8 | 0.25 |
| A5 | *A. xylosoxidans* | 4 | 1 | 256 | 8 | 32 | 1 | 1 | 4 | 32 | 64 | 128 | 128 | 4 | 256 | 32 |
| A6 | *A. xylosoxidans* | 4 | 0.25 | 128 | 4 | 32 | 0.25 | 1 | 0.25 | 8 | 8 | 256 | 256 | 4 | 256 | 32 |
| A7 | *A. xylosoxidans* | 16 | 0.5 | 128 | 16 | 32 | 0.5 | 4 | 0.25 | 2 | 4 | 128 | 128 | 0.25 | 256 | 8 |
| A8 | *A. xylosoxidans* | 32 | 0.25 | 32 | 8 | 64 | 0.3 | 1 | 0.06 | 32 | 8 | 256 | 256 | 4 | 256 | 16 |
| A9 | *A. xylosoxidans* | 16 | 0.5 | 128 | 4 | 32 | 0.5 | 4 | 0.25 | 4 | 2 | 64 | 128 | 0.13 | 256 | 16 |
| A10 | *A. xylosoxidans* | 4 | 2 | 256 | 16 | 256 | 2 | 2 | 4 | 32 | 16 | 256 | 256 | 16 | 256 | 256 |
| A11 | *A. xylosoxidans* | 8 | 2 | 256 | 16 | 256 | 4 | 2 | 4 | 32 | 32 | 256 | 256 | 16 | 256 | 256 |
| A12 | *A. xylosoxidans* | 16 | 0.5 | 128 | 16 | 32 | 1 | 1 | 2 | 2 | 2 | 128 | 128 | 0.25 | 128 | 64 |
| A13 | *A. xylosoxidans* | 16 | 0.25 | 128 | 16 | 32 | 0.25 | 1 | 4 | 4 | 8 | 256 | 256 | 32 | 256 | 4 |
| A14 | *A. xylosoxidans* | 8 | 0.5 | 32 | 4 | 32 | 0.5 | 1 | 0.25 | 16 | 16 | 128 | 128 | 0.13 | 64 | 2 |
| A15 | *A. xylosoxidans* | 32 | 0.25 | 64 | 16 | 128 | 0.5 | 1 | 0.125 | 16 | 16 | 128 | 128 | 0.25 | 64 | 4 |
| A16 | *A. xylosoxidans* | 32 | 4 | 256 | 4 | 64 | 2 | 1 | 0.25 | 32 | 32 | 256 | 128 | 16 | 256 | 256 |
| A17 | *A. xylosoxidans* | 4 | 1 | 256 | 4 | 32 | 0.5 | 2 | 1 | 2 | 2 | 128 | 256 | 4 | 8 | 16 |
| A18 | *A. xylosoxidans* | 16 | 2 | 128 | 4 | 32 | 0.5 | 1 | 0.5 | 1 | 1 | 256 | 1024 | 4 | 64 | 16 |
| A19 | *A. xylosoxidans* | 128 | 32 | 256 | 8 | 8 | 16 | 128 | 64 | 4 | 0.125 | 256 | 256 | 32 | 16 | 32 |
| A20 | *A. xylosoxidans* | 16 | 8 | 128 | 32 | 128 | 2 | 4 | 0.125 | 4 | 2 | 128 | 128 | 1 | 32 | 32 |

AMP: ampicillin, PIP: piperacillin, FOX: cefoxitin, CAZ: ceftazidime FEP: cefepime, PTZ: piperacillin/tazobactam, IPM: imipenem, MEM: meropenem, CIP: ciprofloxacin, LEV: levofloxacin, KAN: kanamicin, GEN: gentamicin, TMS: trimethoprim-sulfamethoxazole, TET: tetracicline, COL: colistin.
